# Supplementary material
Source: Springer Nature journal article supplement (https://www.springermedizin.de/resource/supplementary/12990_2013_588_MOESM2_ESM.pdf/9613574)
Supplement: MOESM2 [file 9613574]

| <b>Symbol</b>        | <b>Description</b>                                                         | <b>Fold change</b> |
|----------------------|----------------------------------------------------------------------------|--------------------|
| <b>Ogg1</b>          | 8-oxoguanine DNA-glycosylase 1                                             | 4.12               |
| <b>Fam13c</b>        | family with sequence similarity 13, member C                               | 2.47               |
| <b>Cd274</b>         | CD274 antigen                                                              | 2.03               |
| <b>Man2a2</b>        | mannosidase 2, alpha 2                                                     | 1.92               |
| <b>Hist1h1e</b>      | histone cluster 1, H1e                                                     | 1.91               |
| <b>Zfp445</b>        | zinc finger protein 445                                                    | 1.79               |
| <b>Olfr921</b>       | olfactory receptor 921                                                     | 1.76               |
| <b>Elavl3</b>        | ELAV (embryonic lethal, abnormal vision, Drosophila)-like 3 (Hu antigen C) | 1.76               |
| <b>Glytk</b>         | glycerate kinase                                                           | 1.74               |
| <b>Frmf5</b>         | FERM domain containing 5                                                   | 1.72               |
| <b>Esr1</b>          | estrogen receptor 1 (alpha)                                                | 1.72               |
| <b>Npnt</b>          | nephronectin                                                               | 1.72               |
| <b>Gsta3</b>         | glutathione S-transferase, alpha 3                                         | 1.68               |
| <b>Actr8</b>         | ARP8 actin-related protein 8 homolog (S. cerevisiae)                       | 1.66               |
| <b>Tcf15</b>         | transcription factor 15                                                    | 1.65               |
| <b>Cyld</b>          | cylindromatosis (turban tumor syndrome)                                    | 1.65               |
| <b>Ppp4r1l-ps</b>    | protein phosphatase 4, regulatory subunit 1-like, pseudogene               | 1.64               |
| <b>Cntn5</b>         | contactin 5                                                                | 1.62               |
| <b>Kif3b</b>         | kinesin family member 3B                                                   | 1.62               |
| <b>A830010M20Rik</b> | RIKEN cDNA A830010M20 gene                                                 | 1.61               |
| <b>Cyr61</b>         | cysteine rich protein 61                                                   | 1.61               |
| <b>Rapgef6</b>       | Rap guanine nucleotide exchange factor (GEF) 6                             | 1.60               |
| <b>Serpine2</b>      | serine (or cysteine) peptidase inhibitor, clade E, member 2                | 1.60               |
| <b>2410066E13Rik</b> | RIKEN cDNA 2410066E13 gene                                                 | 1.59               |
| <b>Vprbp</b>         | Vpr (HIV-1) binding protein                                                | 1.59               |
| <b>Grap</b>          | GRB2-related adaptor protein                                               | 1.59               |
| <b>Stk16</b>         | serine/threonine kinase 16                                                 | 1.57               |
| <b>Ets1</b>          | E26 avian leukemia oncogene 1, 5' domain                                   | 1.57               |
| <b>Luzp1</b>         | leucine zipper protein 1                                                   | 1.57               |
| <b>Srp54a</b>        | signal recognition particle 54A                                            | 1.56               |
| <b>Crebl2</b>        | cAMP responsive element binding protein-like 2                             | 1.56               |
| <b>Snx30</b>         | sorting nexin family member 30                                             | 1.55               |
| <b>Sec23ip</b>       | Sec23 interacting protein                                                  | 1.55               |
| <b>Msto1</b>         | misato homolog 1 (Drosophila)                                              | 1.55               |
| <b>Col24a1</b>       | collagen, type XXIV, alpha 1                                               | 1.54               |
| <b>Brd3</b>          | bromodomain containing 3                                                   | 1.54               |
| <b>Wnt11</b>         | wingless-related MMTV integration site 11                                  | 1.54               |
| <b>Ppp1r9a</b>       | protein phosphatase 1, regulatory (inhibitor) subunit 9A                   | 1.52               |
| <b>Zfp169</b>        | zinc finger protein 169                                                    | 1.51               |
| <b>Anp32e</b>        | acidic (leucine-rich) nuclear phosphoprotein 32 family, member E           | 1.51               |
| <b>Fam134b</b>       | family with sequence similarity 134, member B                              | 1.51               |
| <b>Xpo4</b>          | exportin 4                                                                 | 1.51               |
| <b>Dscam</b>         | Down syndrome cell adhesion molecule                                       | 1.50               |

|                      |                                                                                   |      |
|----------------------|-----------------------------------------------------------------------------------|------|
| <b>Ccn1</b>          | cyclin L1                                                                         | 1.50 |
| <b>Madd</b>          | MAP-kinase activating death domain                                                | 1.50 |
| <b>Retnlg</b>        | resistin like gamma                                                               | 0.12 |
| <b>Lrg1</b>          | leucine-rich alpha-2-glycoprotein 1                                               | 0.20 |
| <b>Chad</b>          | chondroadherin                                                                    | 0.41 |
| <b>Bst1</b>          | bone marrow stromal cell antigen 1                                                | 0.42 |
| <b>Rac2</b>          | RAS-related C3 botulinum substrate 2                                              | 0.43 |
| <b>Tspo2</b>         | translocator protein 2                                                            | 0.46 |
| <b>Olfr536</b>       | olfactory receptor 536                                                            | 0.47 |
| <b>Vwf</b>           | Von Willebrand factor homolog                                                     | 0.48 |
| <b>4930579J09Rik</b> | RIKEN cDNA 4930579J09 gene                                                        | 0.48 |
| <b>Cd52</b>          | CD52 antigen                                                                      | 0.49 |
| <b>Arhgdib</b>       | Rho, GDP dissociation inhibitor (GDI) beta                                        | 0.49 |
| <b>Cadm3</b>         | cell adhesion molecule 3                                                          | 0.49 |
| <b>Celf3</b>         | VCUGBP, Elav-like family member 3                                                 | 0.49 |
| <b>Ifi30</b>         | interferon gamma inducible protein 30                                             | 0.50 |
| <b>F9</b>            | coagulation factor IX                                                             | 0.50 |
| <b>Cst7</b>          | cystatin F (leukocystatin)                                                        | 0.51 |
| <b>Mepe</b>          | matrix extracellular phosphoglycoprotein with ASARM motif (bone)                  | 0.54 |
| <b>Ttll6</b>         | tubulin tyrosine ligase-like family, member 6                                     | 0.54 |
| <b>Ifitm3</b>        | interferon induced transmembrane protein 3                                        | 0.55 |
| <b>Ccdc33</b>        | coiled-coil domain containing 33                                                  | 0.56 |
| <b>Csf2rb</b>        | colony stimulating factor 2 receptor, beta, low-affinity (granulocyte-macrophage) | 0.56 |
| <b>Ubl7</b>          | ubiquitin-like 7 (bone marrow stromal cell-derived)                               | 0.57 |
| <b>BC026782</b>      | cDNA sequence BC026782                                                            | 0.57 |
| <b>Ccl9</b>          | chemokine (C-C motif) ligand 9                                                    | 0.58 |
| <b>Arl10</b>         | ADP-ribosylation factor-like 10                                                   | 0.58 |
| <b>Nnat</b>          | neuronatin                                                                        | 0.59 |
| <b>Rnasek</b>        | ribonuclease, RNase K                                                             | 0.59 |
| <b>Tgfb1</b>         | transforming growth factor, beta 1                                                | 0.59 |
| <b>Mt3</b>           | metallothionein 3                                                                 | 0.59 |
| <b>Ptprcap</b>       | protein tyrosine phosphatase, receptor type, C polypeptide-associated protein     | 0.60 |
| <b>Mocs1</b>         | molybdenum cofactor synthesis 1                                                   | 0.60 |
| <b>Atn1</b>          | atrophin 1                                                                        | 0.61 |
| <b>H1fx</b>          | H1 histone family, member X                                                       | 0.61 |
| <b>Gpihbp1</b>       | GPI-anchored HDL-binding protein 1                                                | 0.61 |
| <b>Lyl1</b>          | lymphoblastomic leukemia 1                                                        | 0.61 |
| <b>Lrrc25</b>        | leucine rich repeat containing 25                                                 | 0.61 |
| <b>Hc</b>            | hemolytic complement                                                              | 0.62 |
| <b>Ctxn1</b>         | cortexin 1                                                                        | 0.62 |
| <b>Rarres2</b>       | retinoic acid receptor responder (tazarotene induced) 2                           | 0.62 |
| <b>Olfml3</b>        | olfactomedin-like 3                                                               | 0.62 |

|                      |                                                       |      |
|----------------------|-------------------------------------------------------|------|
| <b>Ly6a</b>          | lymphocyte antigen 6 complex, locus A                 | 0.62 |
| <b>Cyba</b>          | cytochrome b-245, alpha polypeptide                   | 0.62 |
| <b>1700012P22Rik</b> | RIKEN cDNA 1700012P22 gene                            | 0.62 |
| <b>Srebf2</b>        | sterol regulatory element binding factor 2            | 0.63 |
| <b>Trp73</b>         | transformation related protein 73                     | 0.63 |
| <b>Pycard</b>        | PYD and CARD domain containing                        | 0.63 |
| <b>Ankrd37</b>       | ankyrin repeat domain 37                              | 0.63 |
| <b>Ccl6</b>          | chemokine (C-C motif) ligand 6                        | 0.63 |
| <b>2210012G02Rik</b> | RIKEN cDNA 2210012G02 gene                            | 0.63 |
| <b>Dkk1</b>          | dickkopf-like 1                                       | 0.63 |
| <b>Sncb</b>          | synuclein, beta                                       | 0.63 |
| <b>Zfp36l1</b>       | zinc finger protein 36, C3H type-like 1               | 0.64 |
| <b>Fchsd1</b>        | FCH and double SH3 domains 1                          | 0.64 |
| <b>Xkr5</b>          | X Kell blood group precursor-related family, member 5 | 0.64 |
| <b>Plod2</b>         | procollagen lysine, 2-oxoglutarate 5-dioxygenase 2    | 0.64 |
| <b>Myrip</b>         | myosin VIIA and Rab interacting protein               | 0.64 |
| <b>Khsrp</b>         | KH-type splicing regulatory protein                   | 0.64 |
| <b>Ikzf2</b>         | IKAROS family zinc finger 2                           | 0.64 |
| <b>Tcl1b4</b>        | T-cell leukemia/lymphoma 1B, 4                        | 0.65 |
| <b>Tst</b>           | thiosulfate sulfurtransferase, mitochondrial          | 0.65 |
| <b>Lrrc3b</b>        | leucine rich repeat containing 3B                     | 0.65 |
| <b>Osmr</b>          | oncostatin M receptor                                 | 0.65 |
| <b>Zfp628</b>        | zinc finger protein 628                               | 0.65 |
| <b>F2r</b>           | coagulation factor II (thrombin) receptor             | 0.65 |
| <b>Ankib1</b>        | ankyrin repeat and IBR domain containing 1            | 0.66 |
| <b>Podn1</b>         | podocan-like 1                                        | 0.66 |
| <b>1700007G11Rik</b> | RIKEN cDNA 1700007G11 gene                            | 0.66 |
| <b>Adprhl1</b>       | ADP-ribosylhydrolase like 1                           | 0.66 |
| <b>Olf1143</b>       | olfactory receptor 1143                               | 0.66 |
| <b>Was</b>           | Wiskott-Aldrich syndrome homolog (human)              | 0.66 |
| <b>Man2a1</b>        | mannosidase 2, alpha 1                                | 0.66 |
| <b>Ccdc40</b>        | coiled-coil domain containing 40                      | 0.66 |
| <b>Alpl2</b>         | alkaline phosphatase, placental-like 2                | 0.66 |
| <b>Hrg</b>           | histidine-rich glycoprotein                           | 0.66 |
| <b>Chia</b>          | chitinase, acidic                                     | 0.66 |
| <b>Itgb2</b>         | integrin beta 2                                       | 0.66 |
| <b>Pelp1</b>         | proline, glutamic acid and leucine rich protein 1     | 0.67 |
